# Supplementary material for: Palladium nanoparticles loaded over sheet-like N-doped graphene oxide: investigation of its catalytic potential in Suzuki coupling, in reduction of nitroarenes and in photodegradation of methyl orange
Source: Royal Society of Chemistry journal article supplement (doi:10.1039/d3nj02020g), 2023-01-01
Supplement: d3nj02020g1.pdf [file d3nj02020g1.pdf]

## Supporting Information

### **Palladium nanoparticles loaded over N-doped graphene oxide: A mesoporous nanocatalytic system in Suzuki coupling and in reduction of nitroarenes**

**Shubham Sharma,<sup>a</sup> Anjani,<sup>a</sup> Mobina Kouser,<sup>a</sup> Monika Gupta<sup>a\*</sup>**

**<sup>a\*</sup>Department of Chemistry, University of Jammu, Jammu-180006, India**

**Email: monika.gupta77@rediffmail.com**

| <b>List of Contents</b>                                                              | <b>Page no.</b> |
|--------------------------------------------------------------------------------------|-----------------|
| 1. Spectral details of the compounds listed in Table 2                               | <b>S3</b>       |
| 2. Spectral details of the compounds listed in Table 4                               | <b>S4</b>       |
| 3. <sup>1</sup> H NMR and <sup>13</sup> C NMR spectra of compounds listed in Table 2 | <b>S5-S6</b>    |
| 4. <sup>1</sup> H NMR and <sup>13</sup> C NMR spectra of compounds listed in Table 4 | <b>S7-S8</b>    |

## 1. Spectral details of the compounds listed in Table 2

**Compound 2a, 4-acetylbiphenyl.** <sup>1</sup>H NMR (400 MHz, CDCl<sub>3</sub>): δ 8.06 (d, J = 8.4 Hz, 2H, ArH), 7.71 (d, J = 8.4 Hz, 2H, ArH), 7.65 (d, J = 7.2 Hz, 2H, ArH), 7.51 (t, J = 7.4 Hz, 2H, ArH), 7.45 (t, J = 7.3 Hz, 1H, ArH), 2.66 (s, 3H, COCH<sub>3</sub>); <sup>13</sup>C NMR (100 MHz, CDCl<sub>3</sub>): δ 197.817, 145.835, 139.86, 135.84, 128.97, 128.951, 128.273, 127.507, 26.63.

**Compound 2c, biphenyl.** <sup>1</sup>H NMR (400 MHz, CDCl<sub>3</sub>): δ 7.65 (d, J = 7.6 Hz, 4H, ArH), 7.47 (t, J = 7.6 Hz, 4H, ArH), 7.36 (t, J = 7.3 Hz, 2H, ArH); <sup>13</sup>C NMR (100 MHz, CDCl<sub>3</sub>): δ 140.41, 128.91, 128.33, 127.29.

**Compound 2f, 4-phenylbenzotrile.** <sup>1</sup>H NMR (400 MHz, CDCl<sub>3</sub>): δ 7.82 (d, Hz, 2H, ArH), 7.76 (d, Hz, 2H, ArH), 7.64 (d, Hz, 2H, ArH), 7.45 (t, Hz, 2H, ArH), 7.37 (t, Hz, H, ArH); <sup>13</sup>C NMR (100 MHz, CDCl<sub>3</sub>): δ 144.83, 140.41, 133.78, 131.23, 128.91, 128.33, 127.29, 119.12, 115.67.

**Compound 2h, 4-phenylphenol.** <sup>1</sup>H NMR (400 MHz, CDCl<sub>3</sub>): δ 7.58 (d, J = 7.2 Hz, 2H, ArH), 7.52 (d, J = 8.6 Hz, 2H, ArH), 7.44 (t, J = 7.6 Hz, 2H, ArH), 7.36 (t, J = 7.3 Hz, 1H, ArH), 6.94 (d, J = 8.6 Hz, 2H, ArH), 5.08 (s, 1H, OH); <sup>13</sup>C NMR (100 MHz, CDCl<sub>3</sub>): δ 155.27, 140.90, 133.96, 132.70, 128.74, 128.404, 126.72, 115.82.

**Compound 2i, 4-(phenyl) aniline.** <sup>1</sup>H NMR (400 MHz, CDCl<sub>3</sub>): δ 7.62 (d, 2H, ArH), 7.44 (q, 4H, ArH), 7.35 (t, 1H, ArH), 6.75 (d, 2H, ArH), 3.99 (s, 2H, NH<sub>2</sub>); <sup>13</sup>C NMR (100 MHz, CDCl<sub>3</sub>): δ 144.38, 140.41, 130.40, 128.91, 128.33, 128.07, 127.29, 116.04.

## 2. Spectral details of the compounds listed in Table 4

**Compound 4a, aniline.** <sup>1</sup>H NMR (400 MHz, CDCl<sub>3</sub>): δ 7.06 (t, J = 6.9 Hz, 2H, ArH), 6.70 (t, J = 7.9 Hz, 1H, ArH), 6.56 (d, J = 8.4 Hz, 2H, ArH), 3.79 (s, 2H, NH<sub>2</sub>); <sup>13</sup>C NMR (100 MHz, CDCl<sub>3</sub>): δ 148.38, 129.45, 117.44, 115.19

**Compound 4b, 2-aminophenol.** <sup>1</sup>H NMR (400 MHz, CDCl<sub>3</sub>): δ 6.62 (m, 2H, ArH), 6.54 (d, 1H, ArH), 6.53 (t, 1H, ArH), 3.66 (s, 1H, OH), 3.61 (s, 2H, NH<sub>2</sub>); <sup>13</sup>C NMR (100 MHz, CDCl<sub>3</sub>): δ 115.56, 115.50, 118.42, 121.29, 136.73, 144.13.

**Compound 4c, *o*-phenylenediammine.** <sup>1</sup>H NMR (400 MHz, CDCl<sub>3</sub>): δ 6.49 (t, 2H, ArH), 6.32 (d, 2H, ArH), 3.48 (s, 4H, 2NH<sub>2</sub>); <sup>13</sup>C NMR (100 MHz, CDCl<sub>3</sub>): δ 136.11, 119.63, 116.79.

**Compound 4d, 4-aminophenol.** <sup>1</sup>H NMR (400 MHz, CDCl<sub>3</sub>): δ 6.55 (d, 2H, ArH), 6.40 (d, 2H, ArH), 3.39 (s, 2H, NH<sub>2</sub>), 3.16 (s, 1H, OH); <sup>13</sup>C NMR (100 MHz, CDCl<sub>3</sub>): δ 148.71, 141.78, 117.27, 116.92.

**Compound 4e, *p*-phenylenediammine.** <sup>1</sup>H NMR (400 MHz, DMSO): δ = 5.06 (s, 4H), 2.87 (s, 4H) ppm. <sup>13</sup>C NMR (126 MHz, DMSO): δ = 139.31, 116.09 ppm

### 3. <sup>1</sup>H NMR and <sup>13</sup>C NMR spectra of compounds listed in Table 2

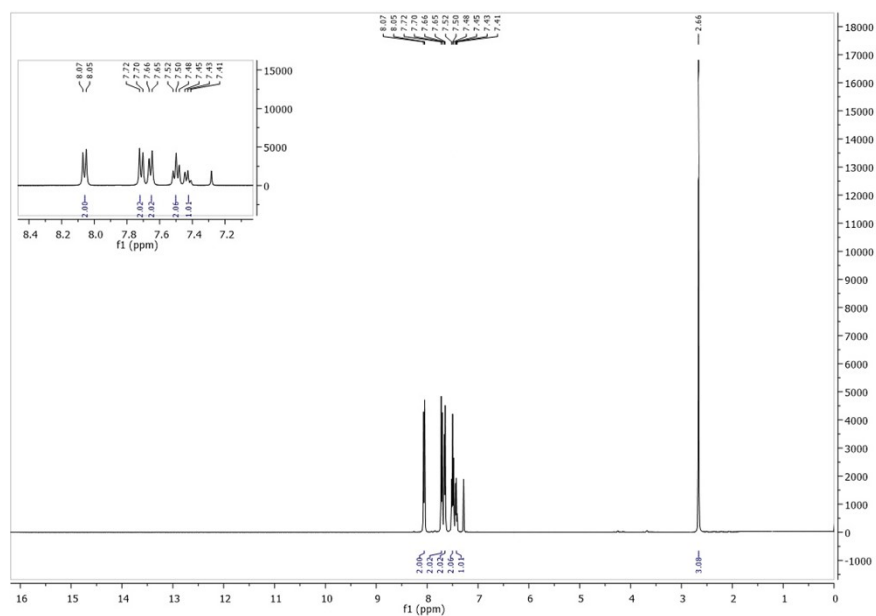

Figure S1. <sup>1</sup>H NMR spectrum of 4-acetylbiphenyl

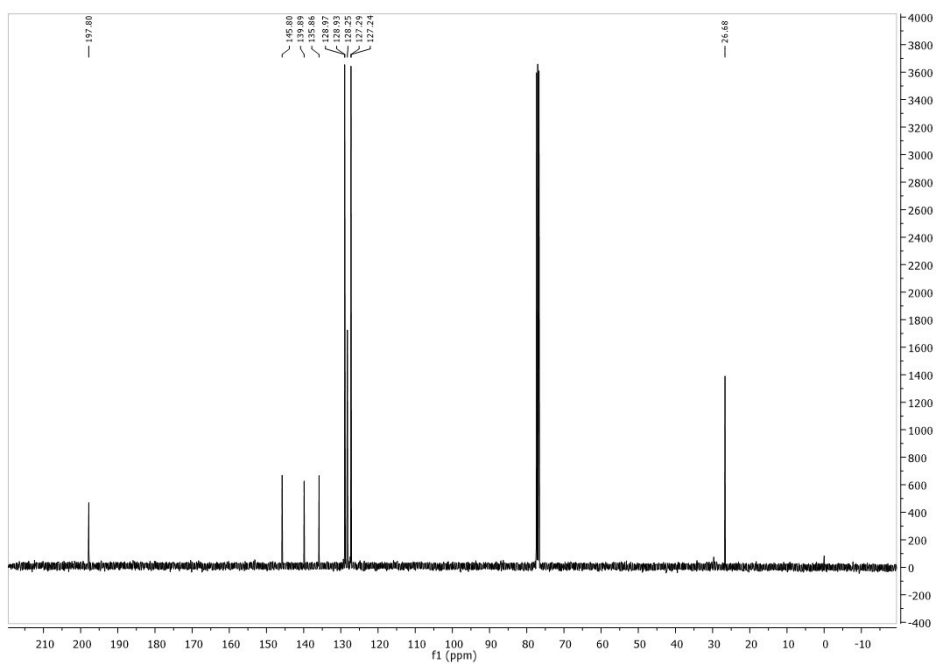

Figure S2. <sup>13</sup>C spectra of 4-acetylbiphenyl

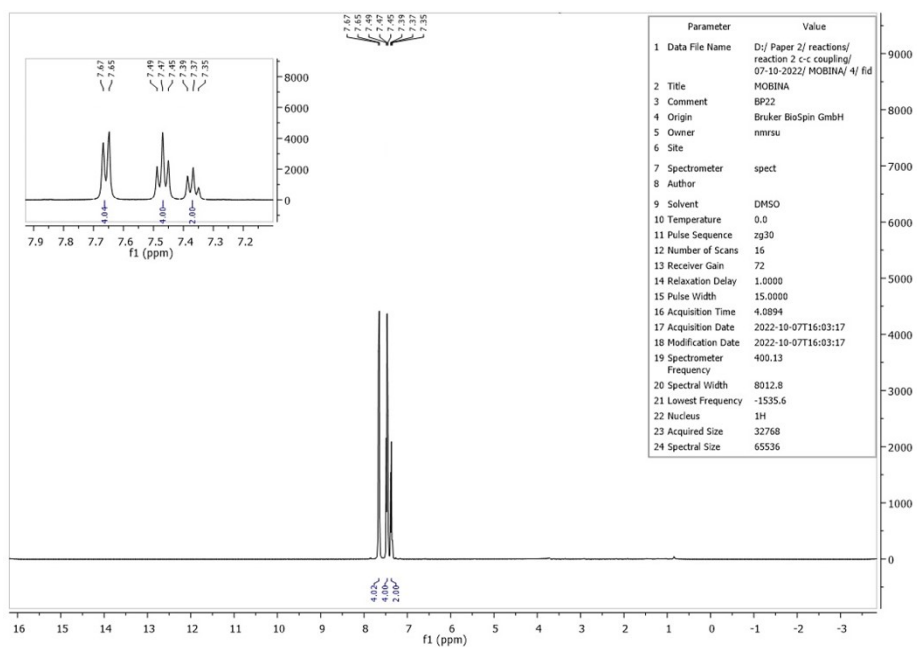

Figure S3. <sup>1</sup>H NMR spectrum of biphenyl

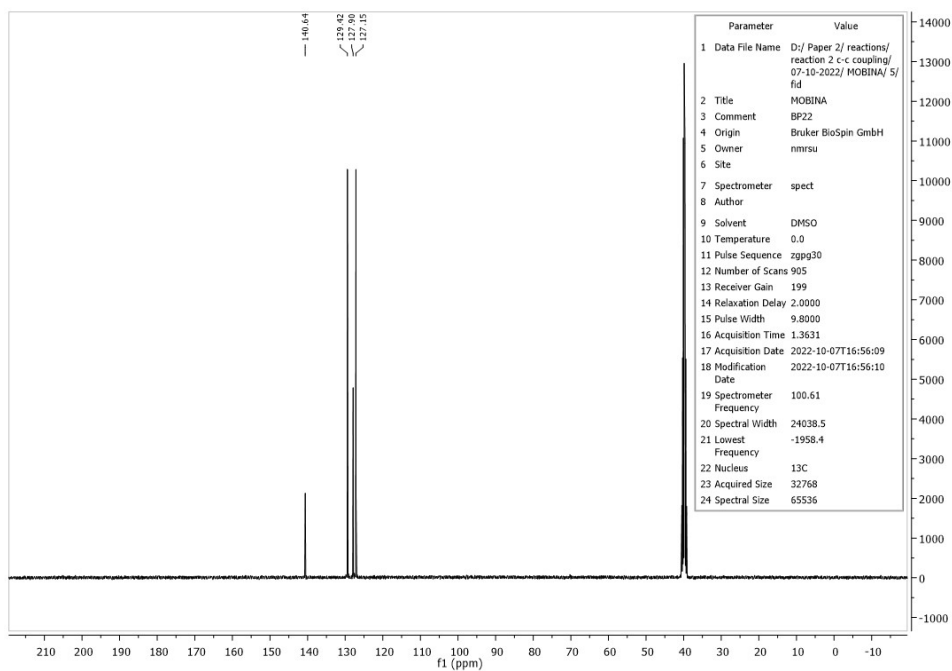

Figure S4.  $^{13}\text{C}$  NMR spectrum of biphenyl

#### 4. $^1\text{H}$ NMR and $^{13}\text{C}$ NMR spectra of compounds listed in Table 4

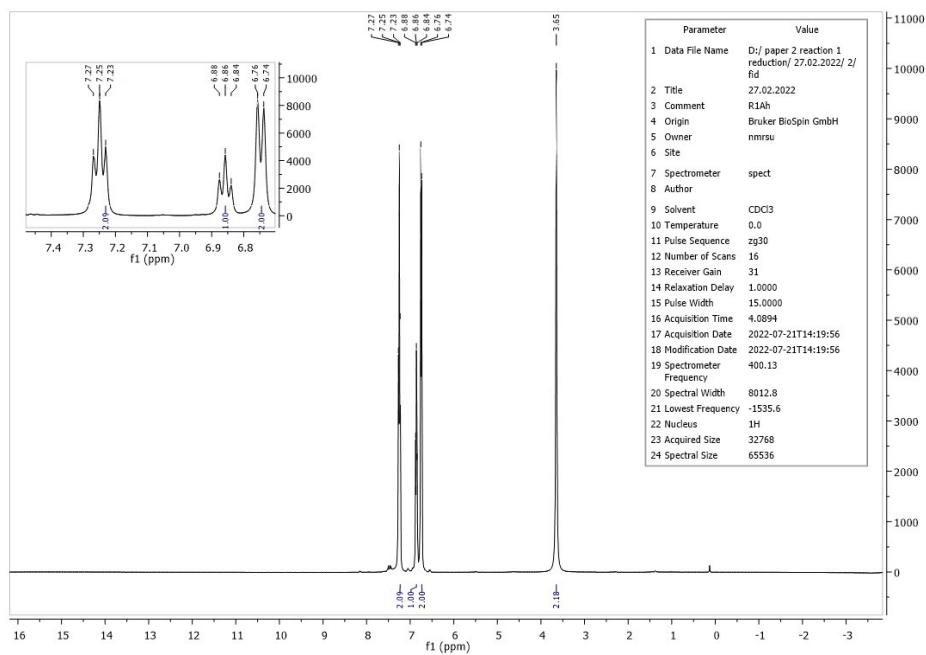

Figure S5.  $^1\text{H}$  NMR spectrum of aniline

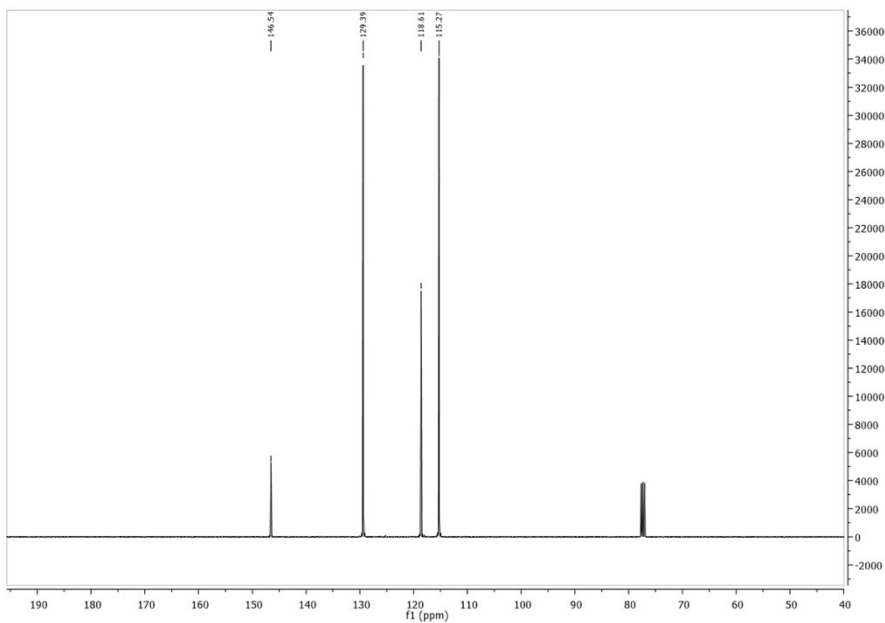

**Figure S6.**  $^{13}\text{C}$  NMR spectrum of aniline

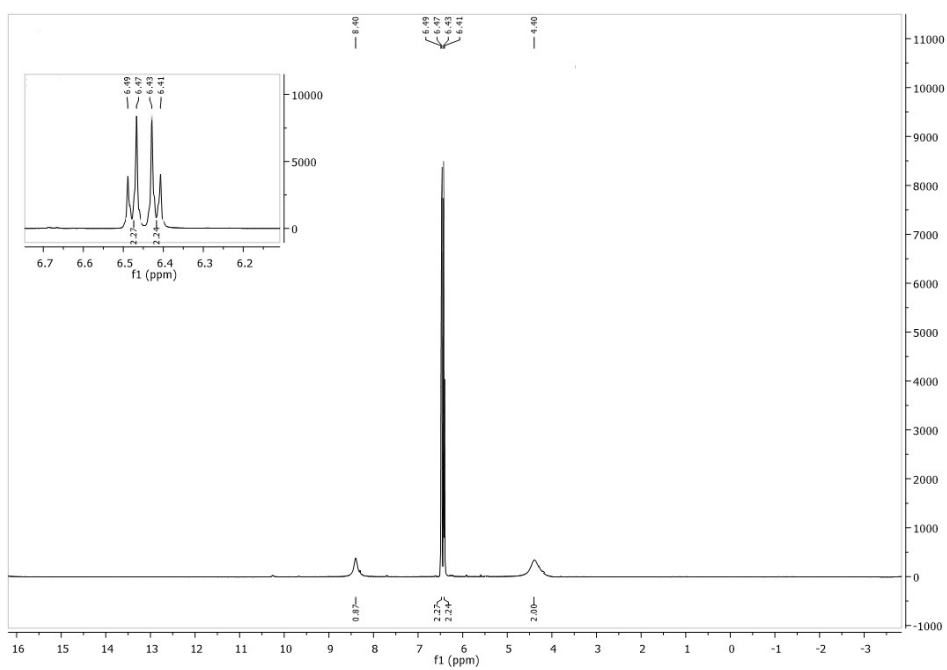

**Figure S7.**  $^1\text{H}$  NMR spectrum of 4-aminophenol

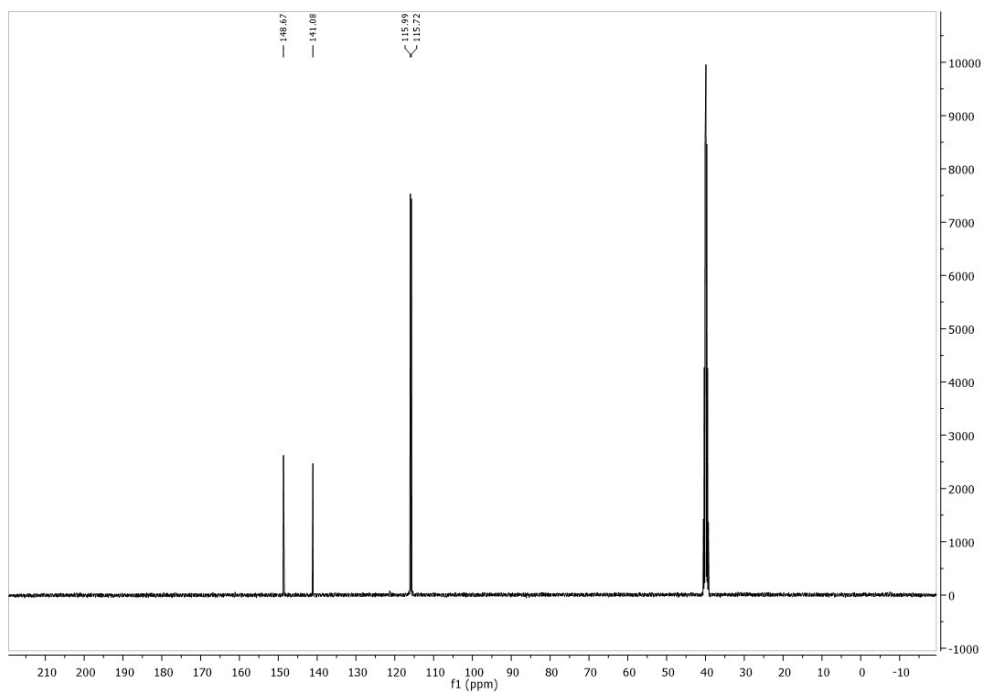

**Figure S8.**  $^{13}\text{C}$  NMR spectrum of 4-aminophenol
